# Supplementary figures and images for: An Integrative Bioinformatic Analysis for Keratinase Detection in Marine-Derived Streptomyces
Source: MDPI journal article supplement (doi:10.3390/md19060286), 2021-05-21

- Keratinase
- Keratinase-linked protein
- Non-keratinase
- Three-strain

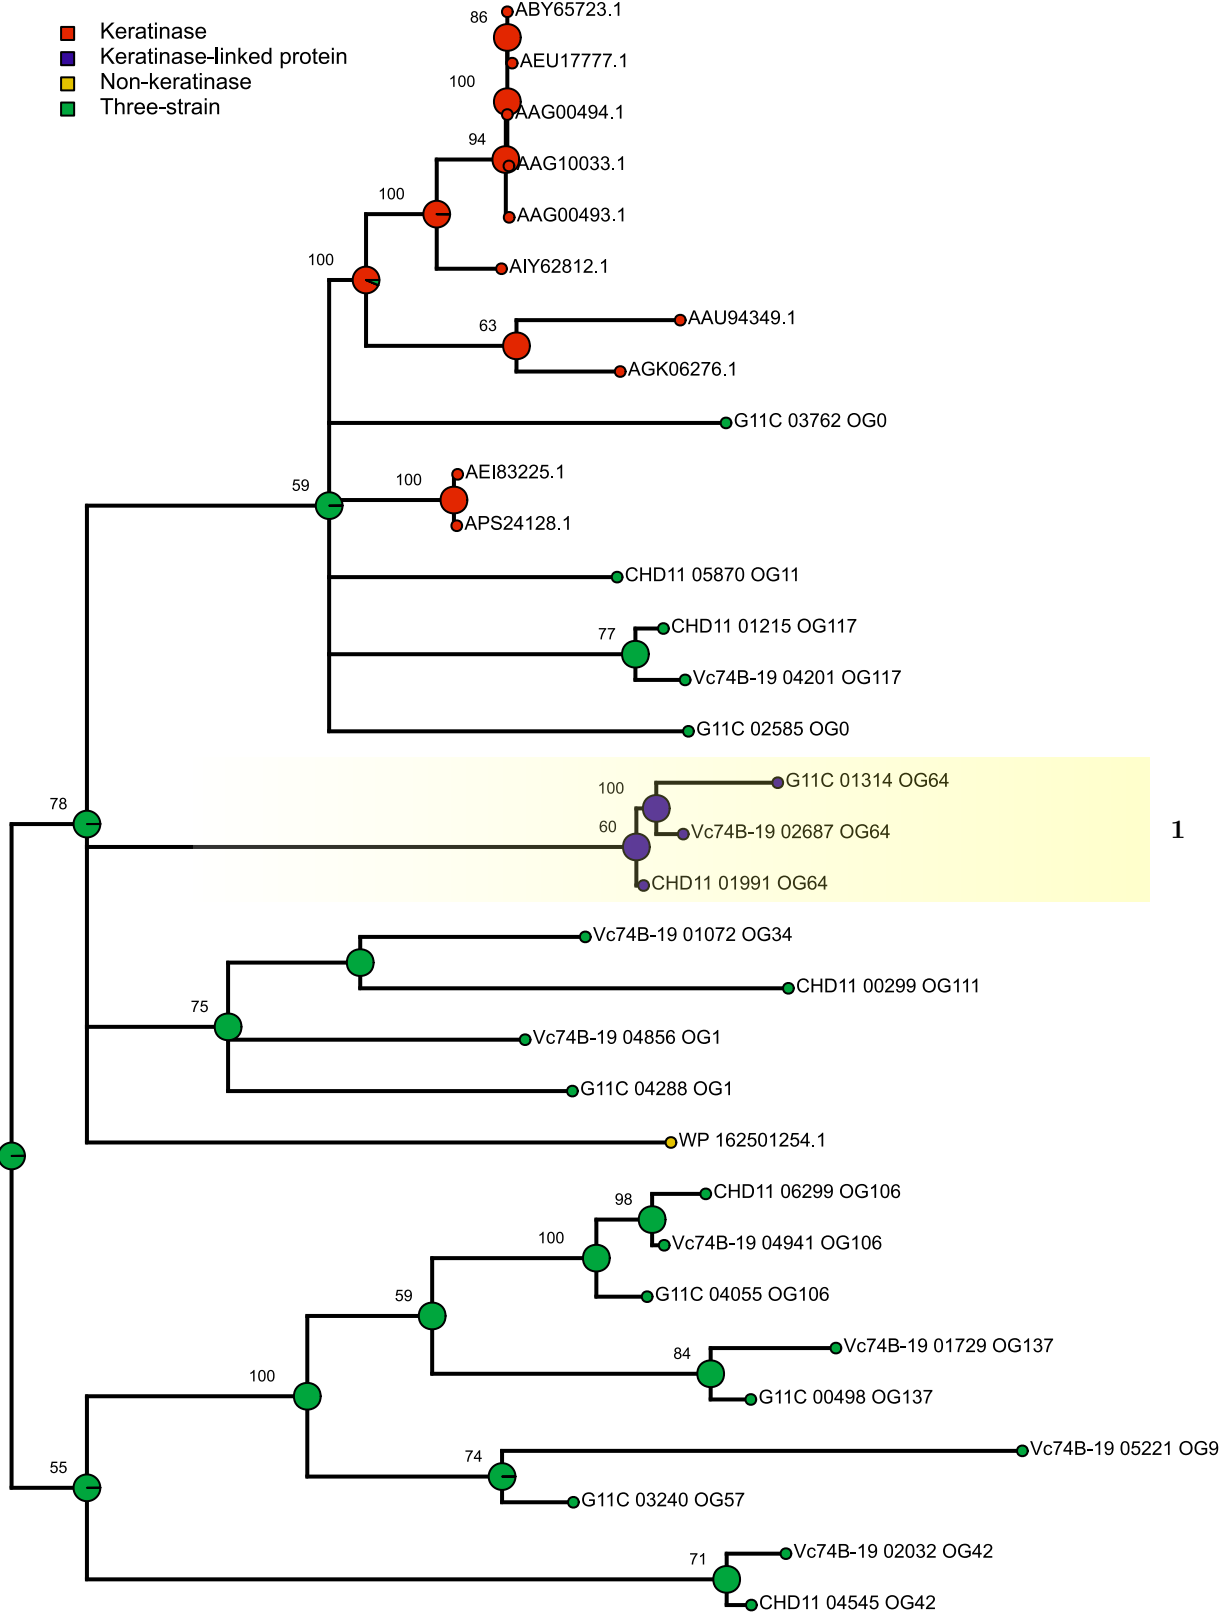

1

0.5

Supplement: s1 [file s1]

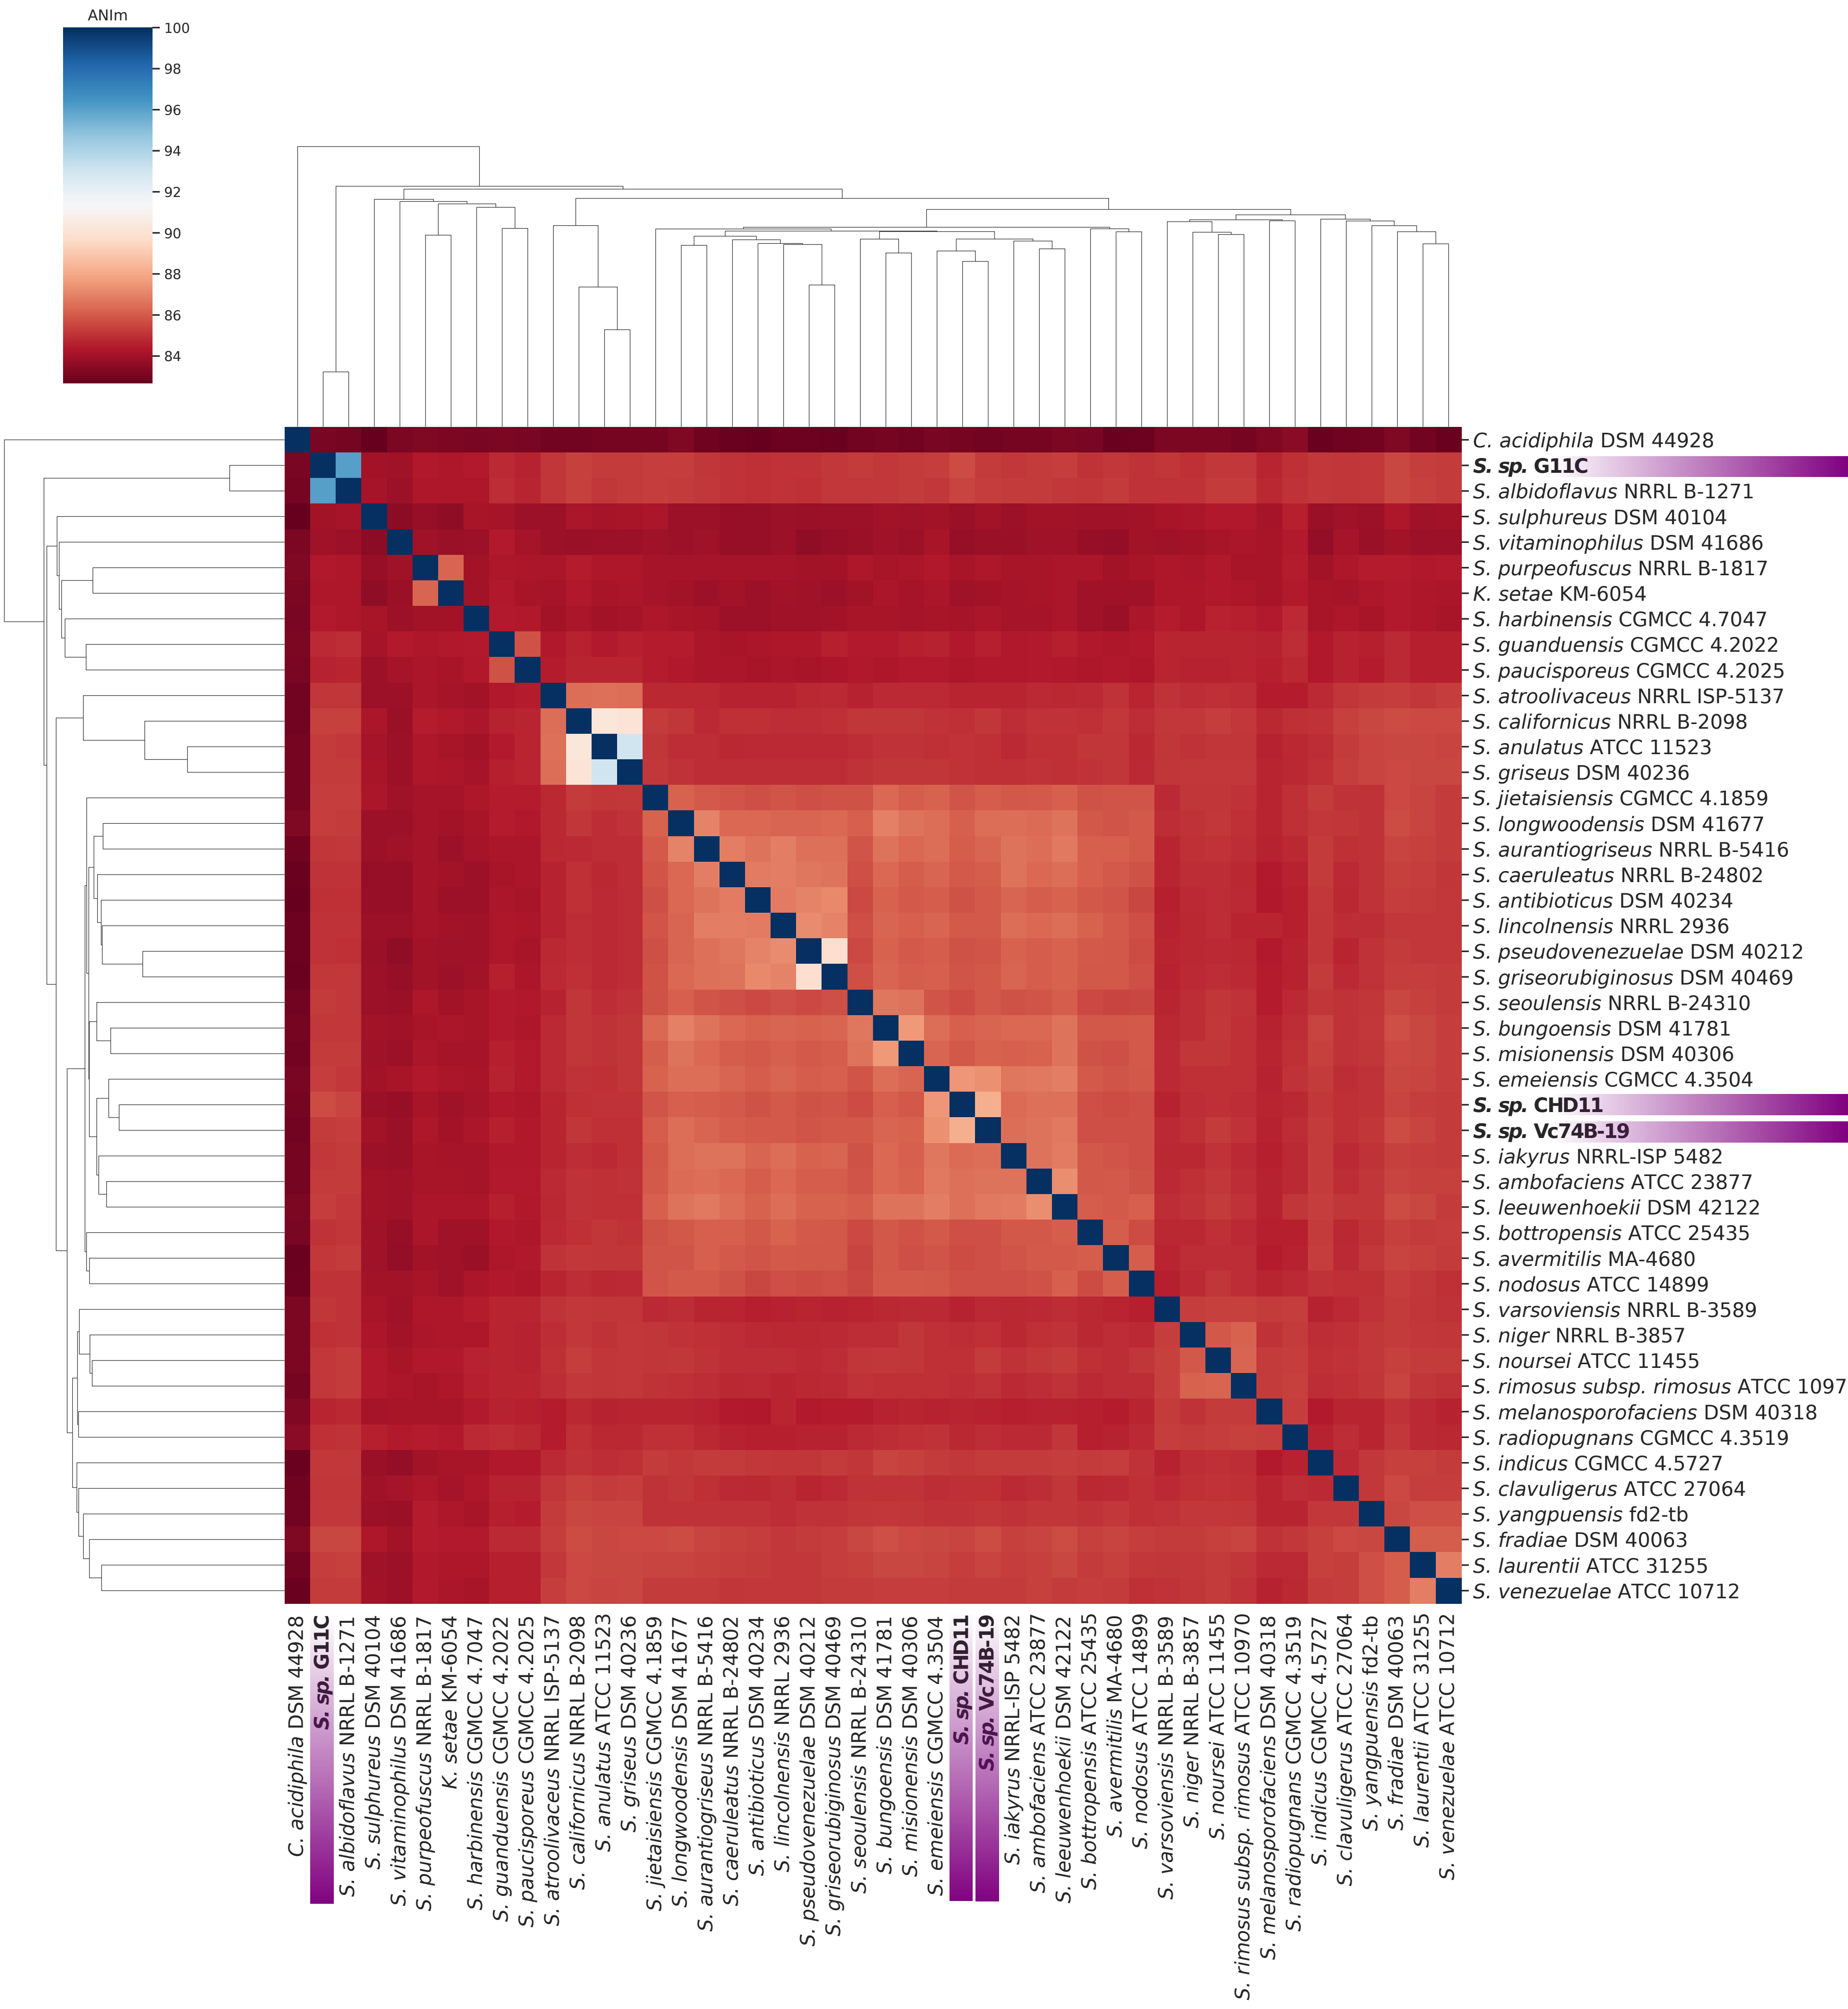

Supplement: s1 [file s1]

**A**
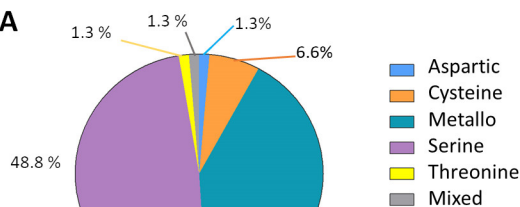

**Streptomyces sp. G11C**  
151 peptidases

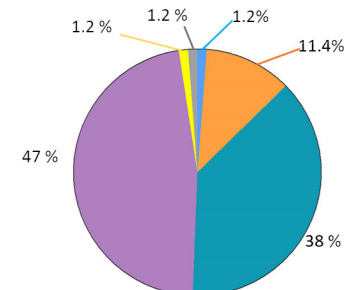

**Streptomyces sp. CHD11**  
166 peptidases

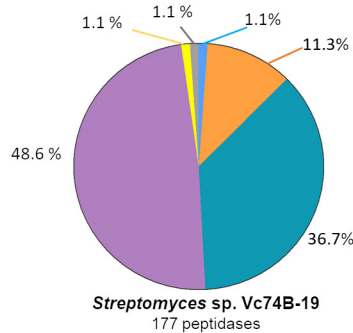
**B**
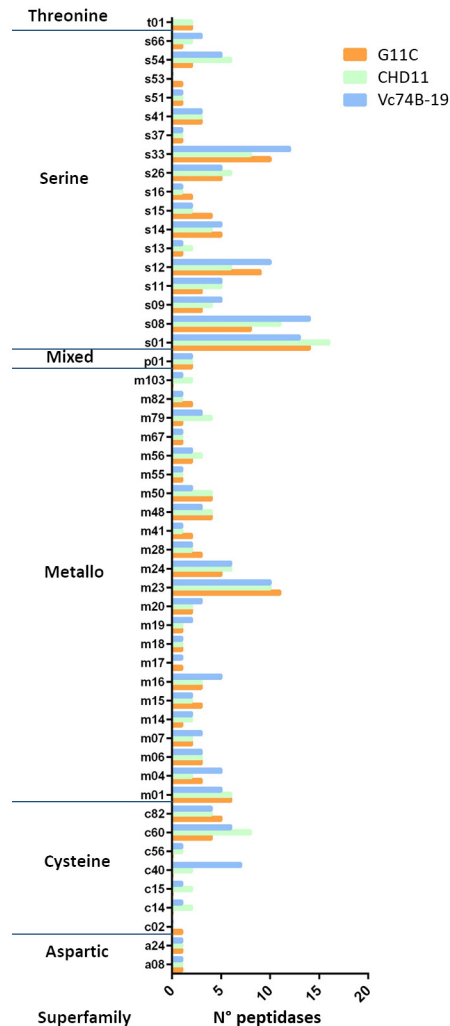

Supplement: s1 [file s1]

A

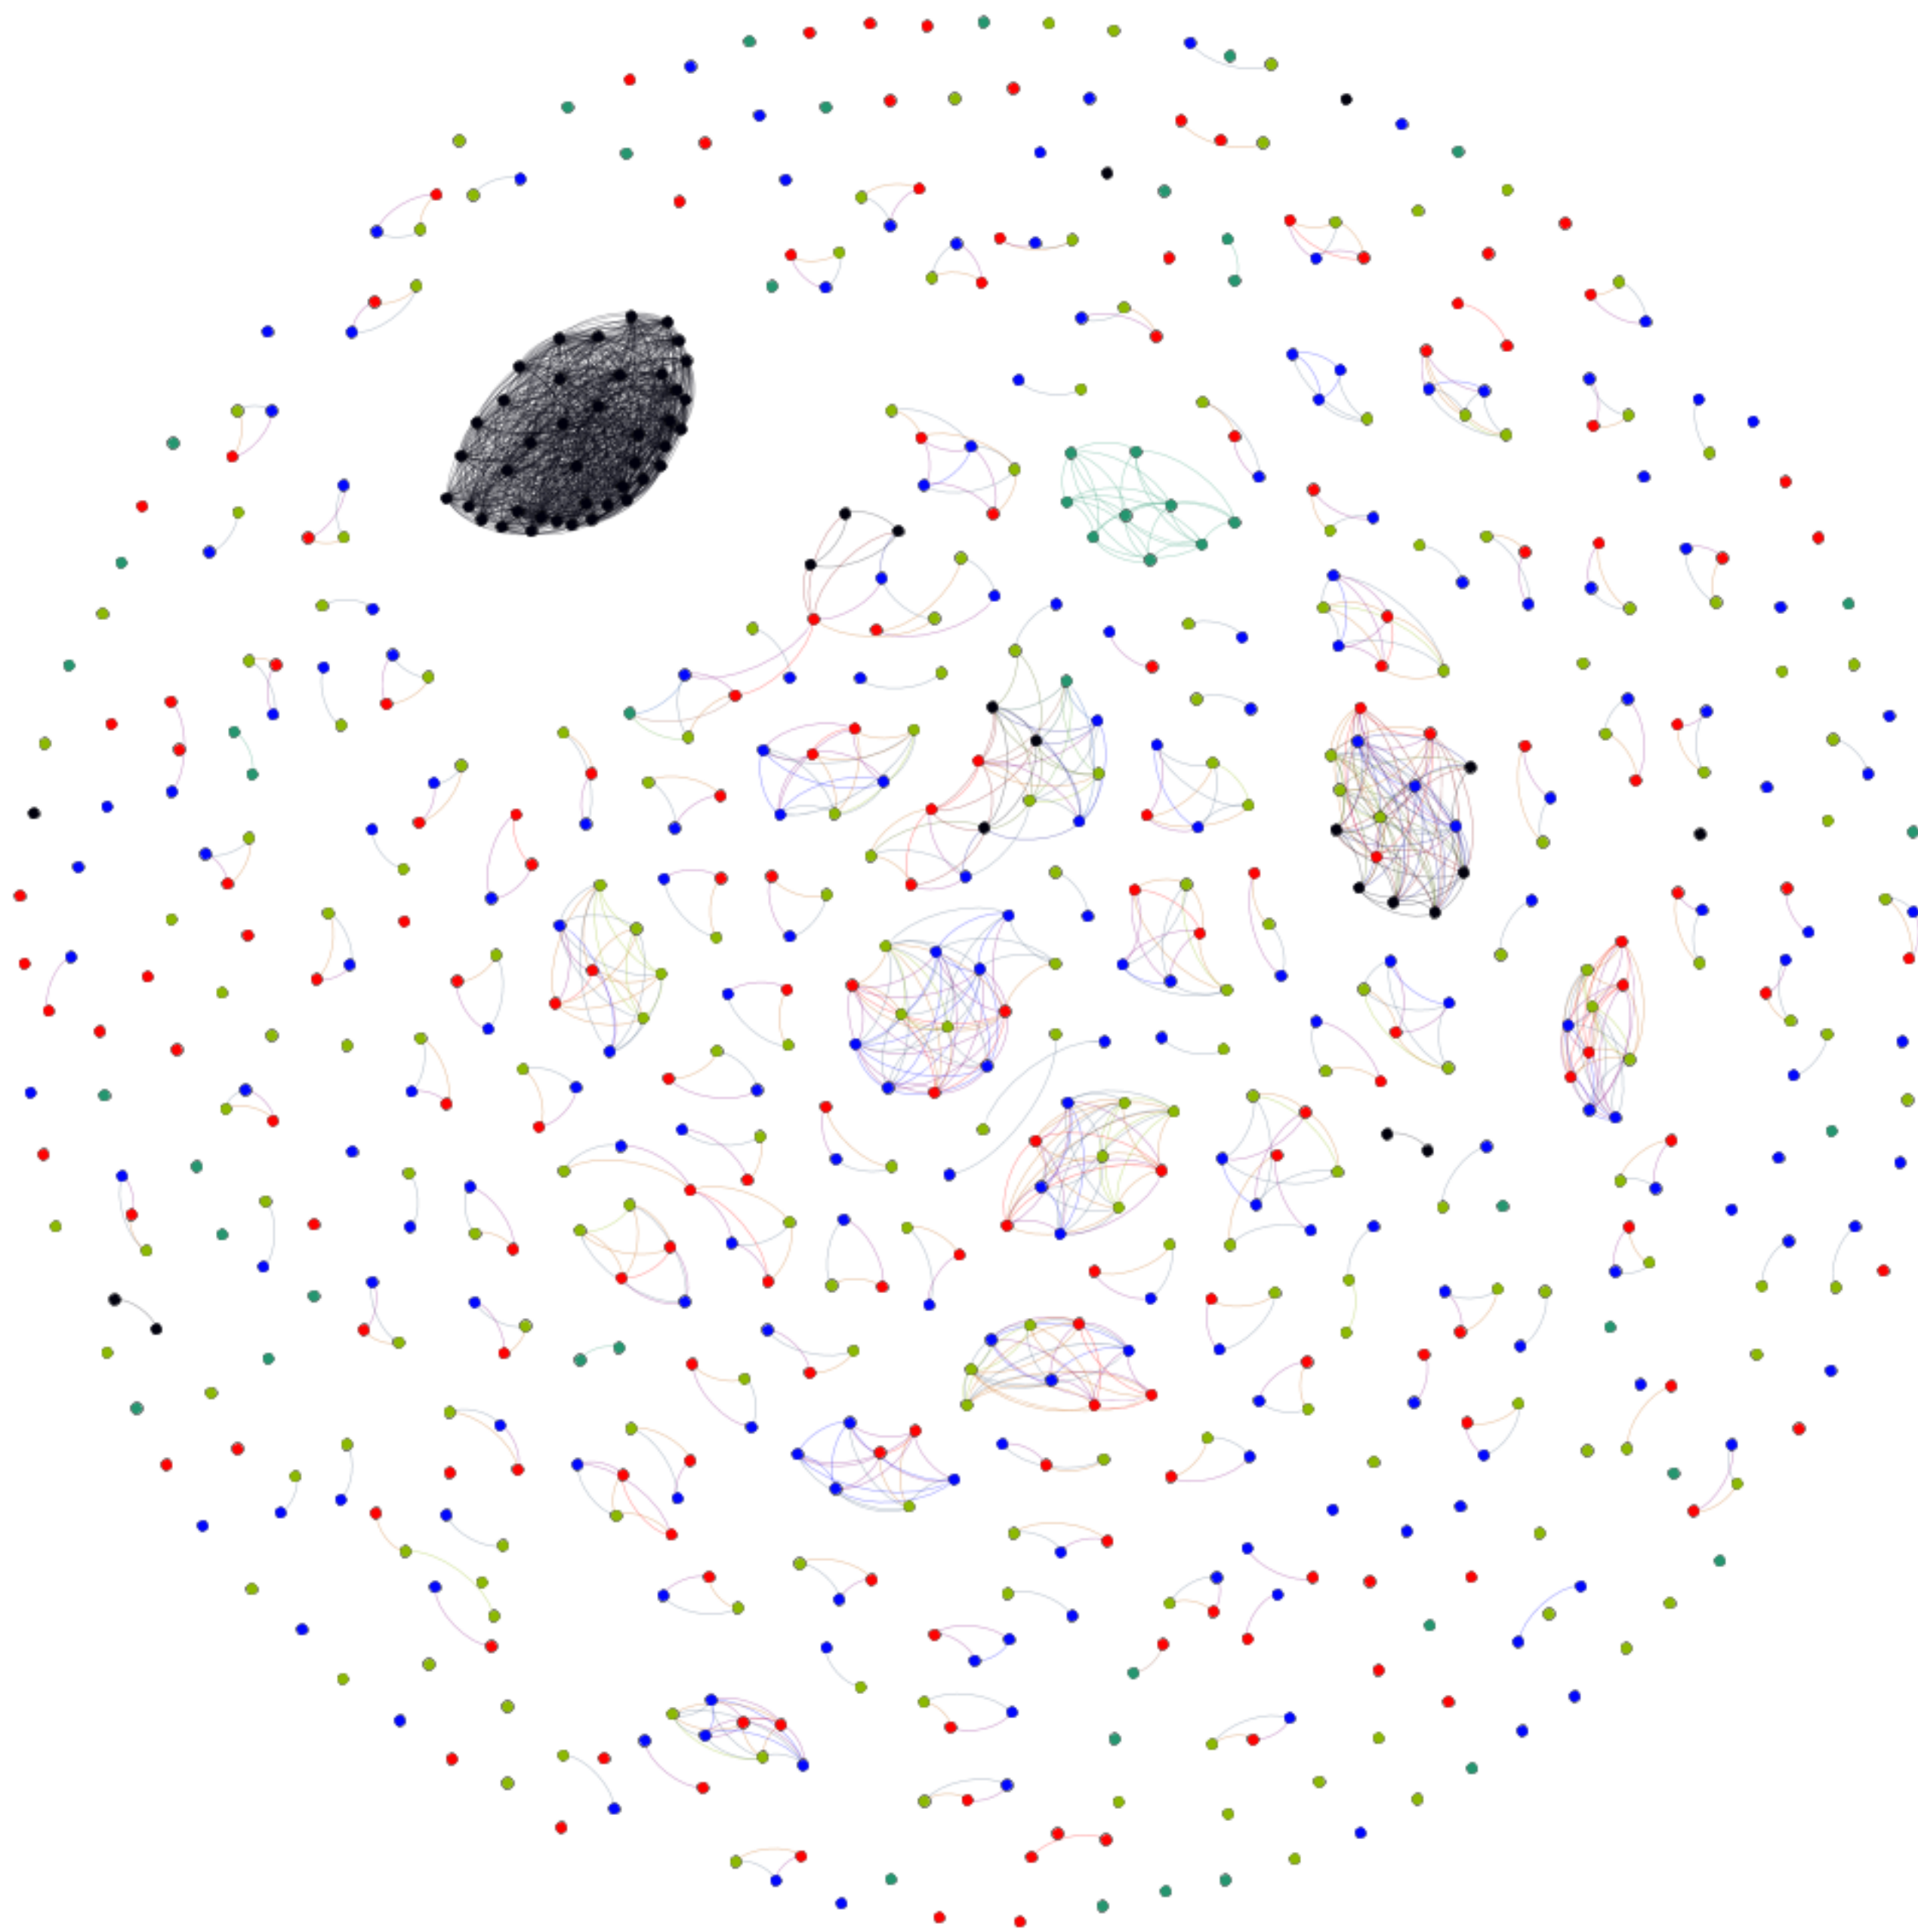

B

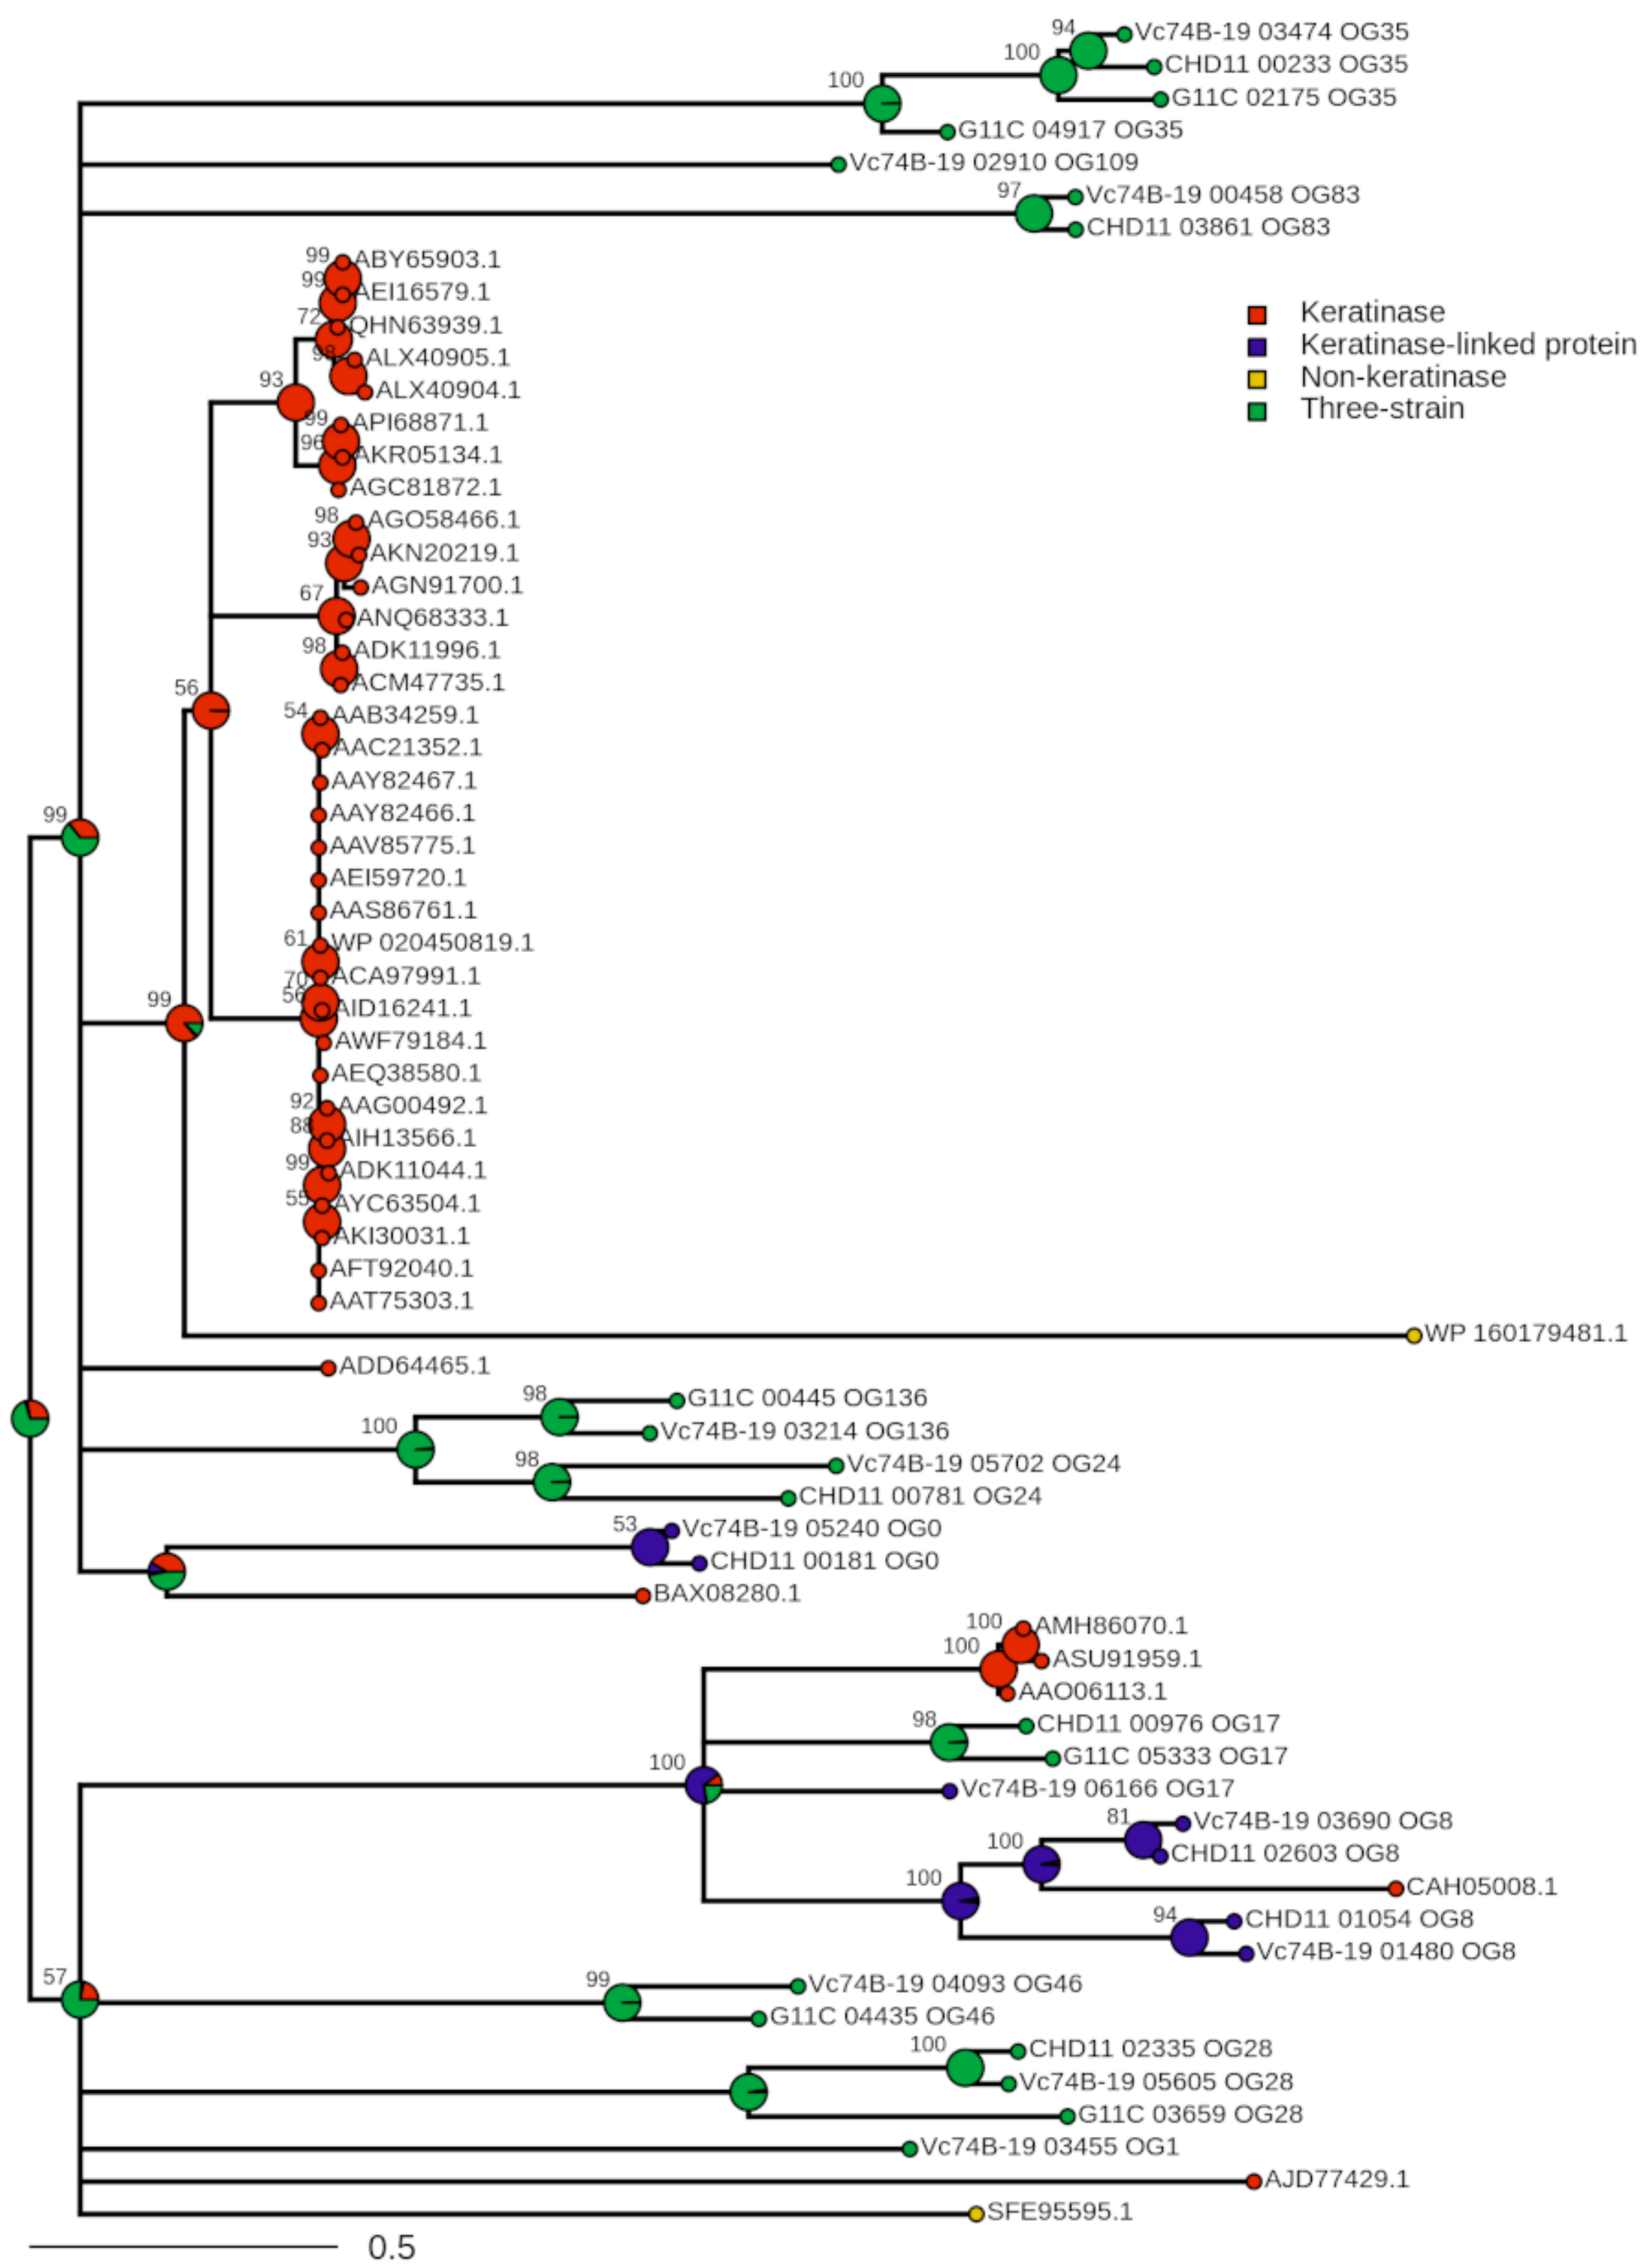

C

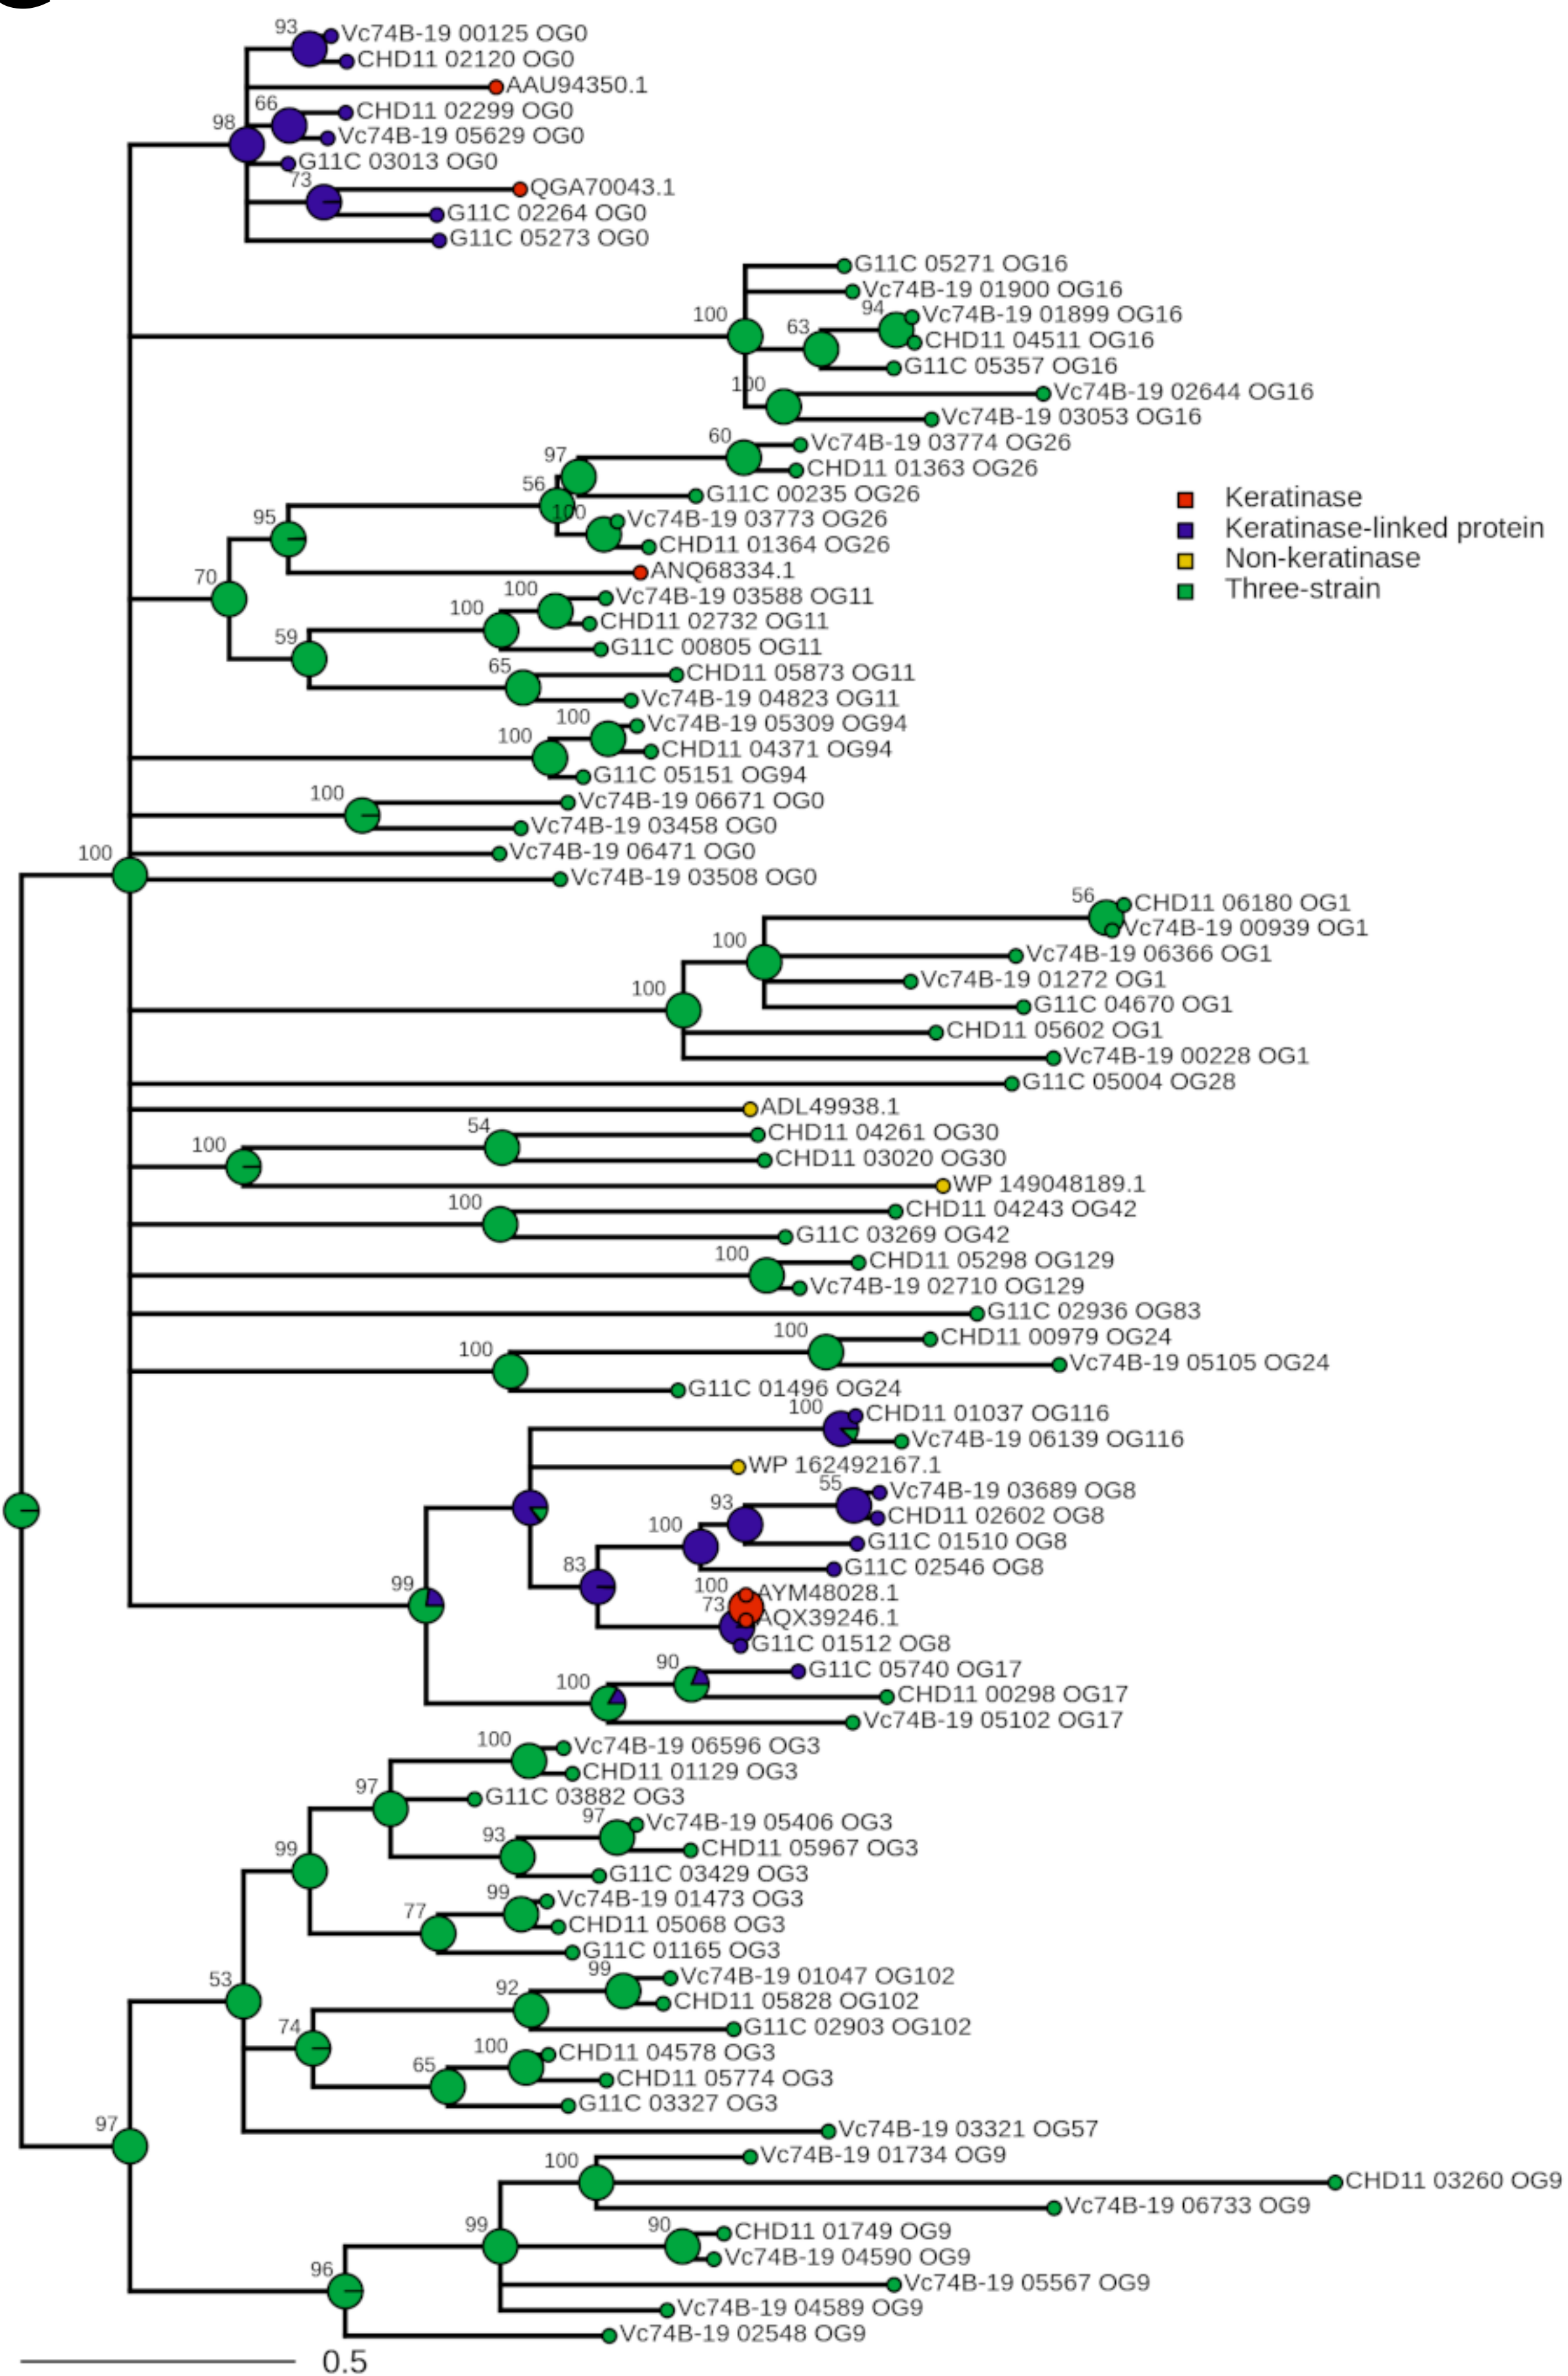

Supplement: s1 [file s1]

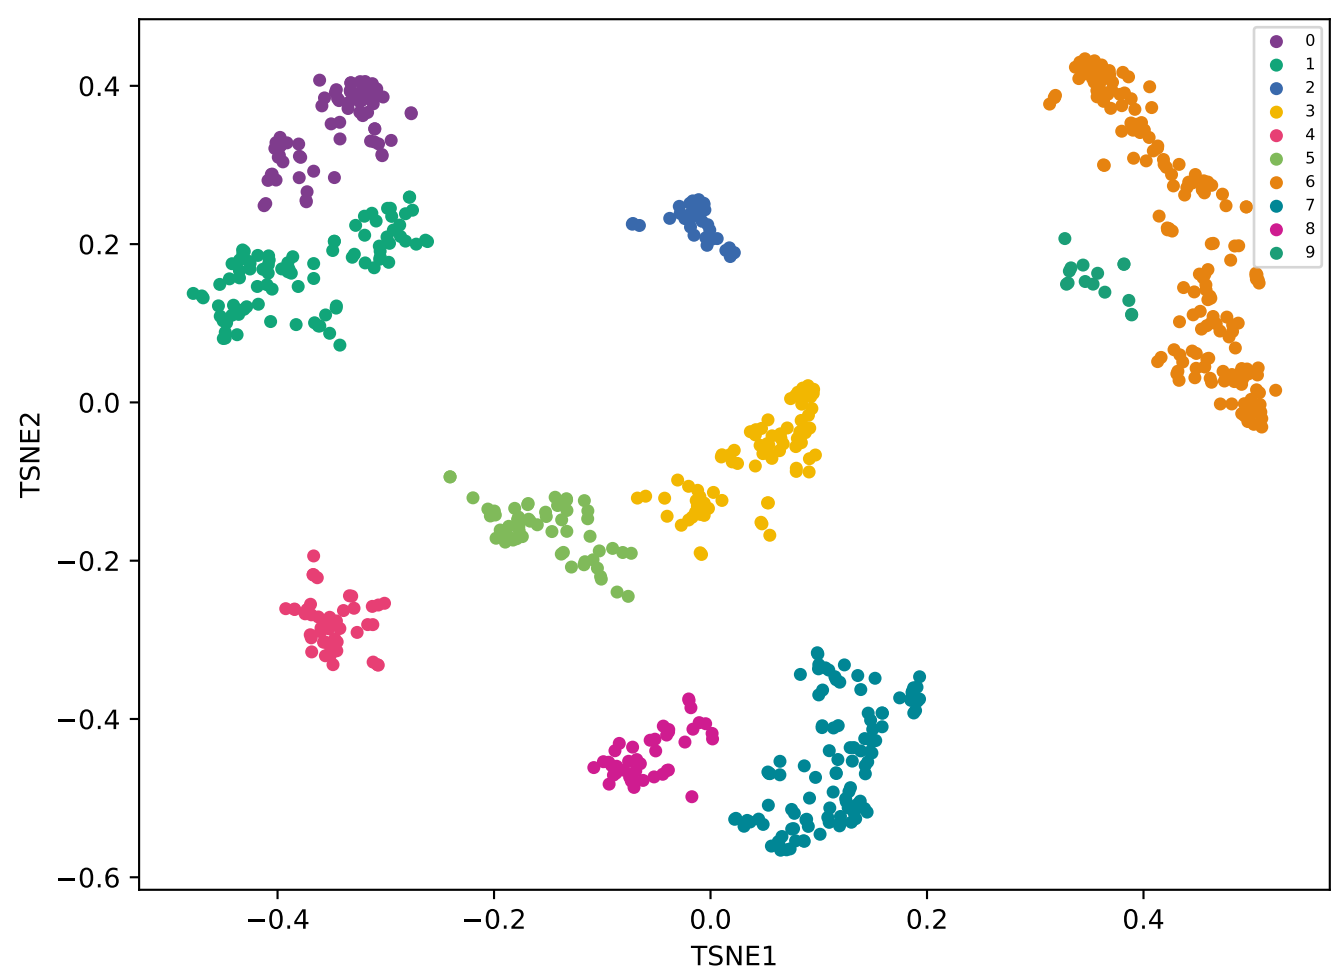

Supplement: s1 [file s1]

# Group 0

# Group 1

# Group 2

Before

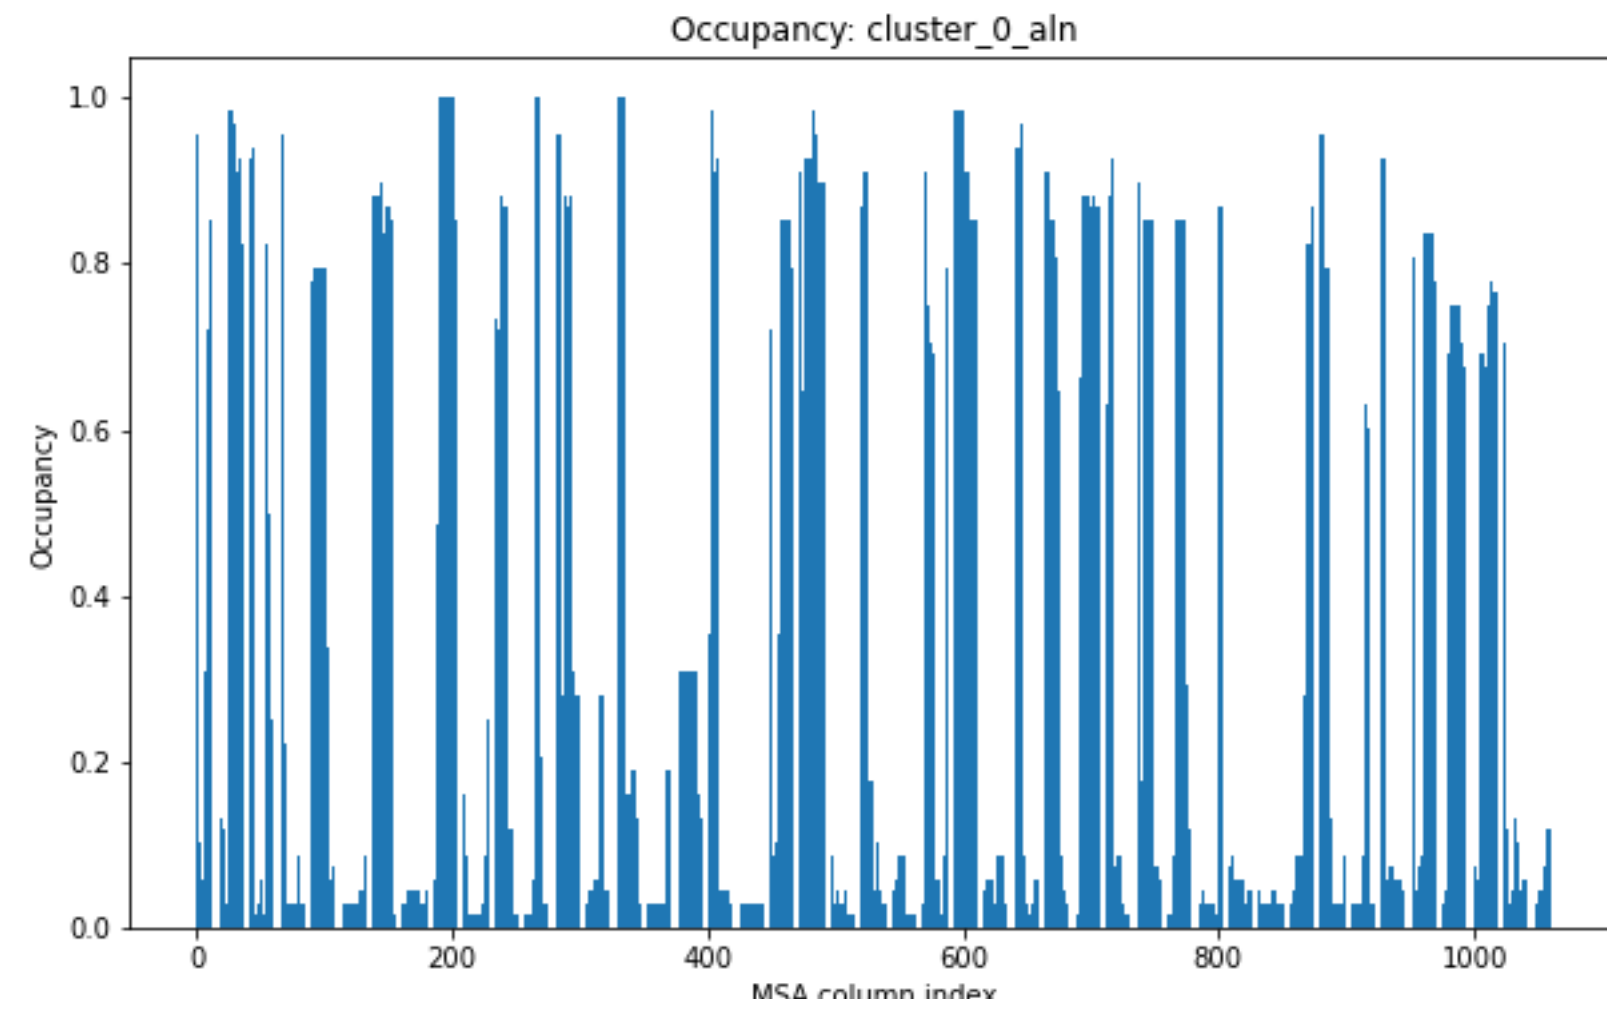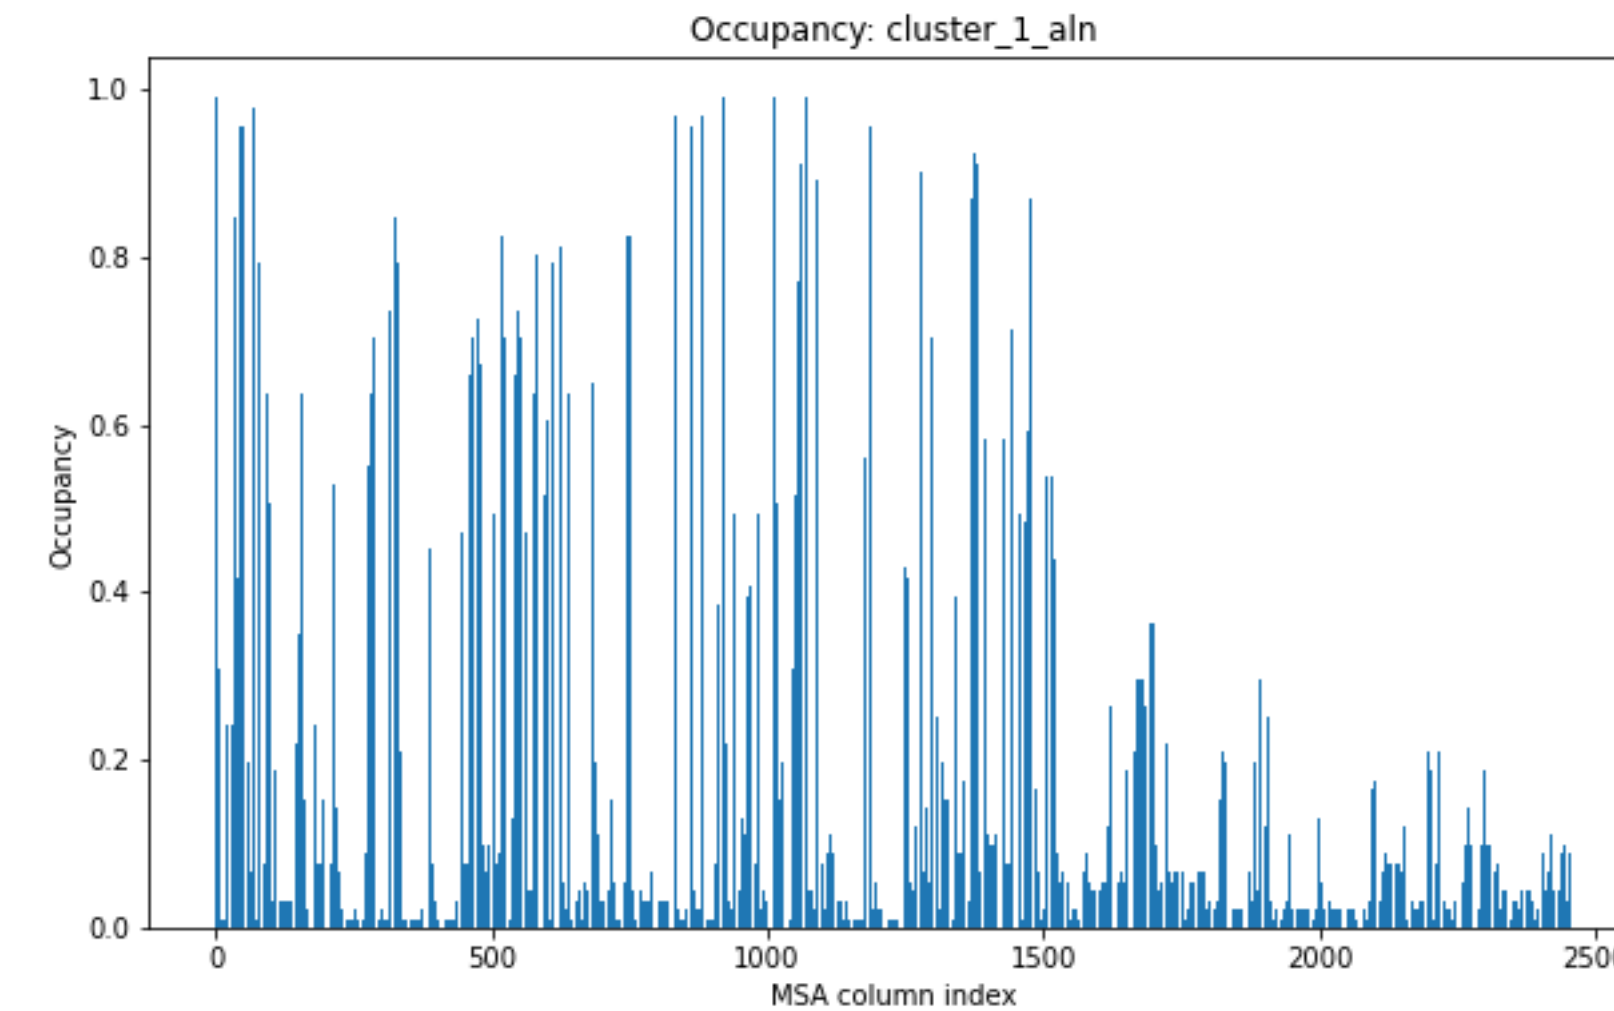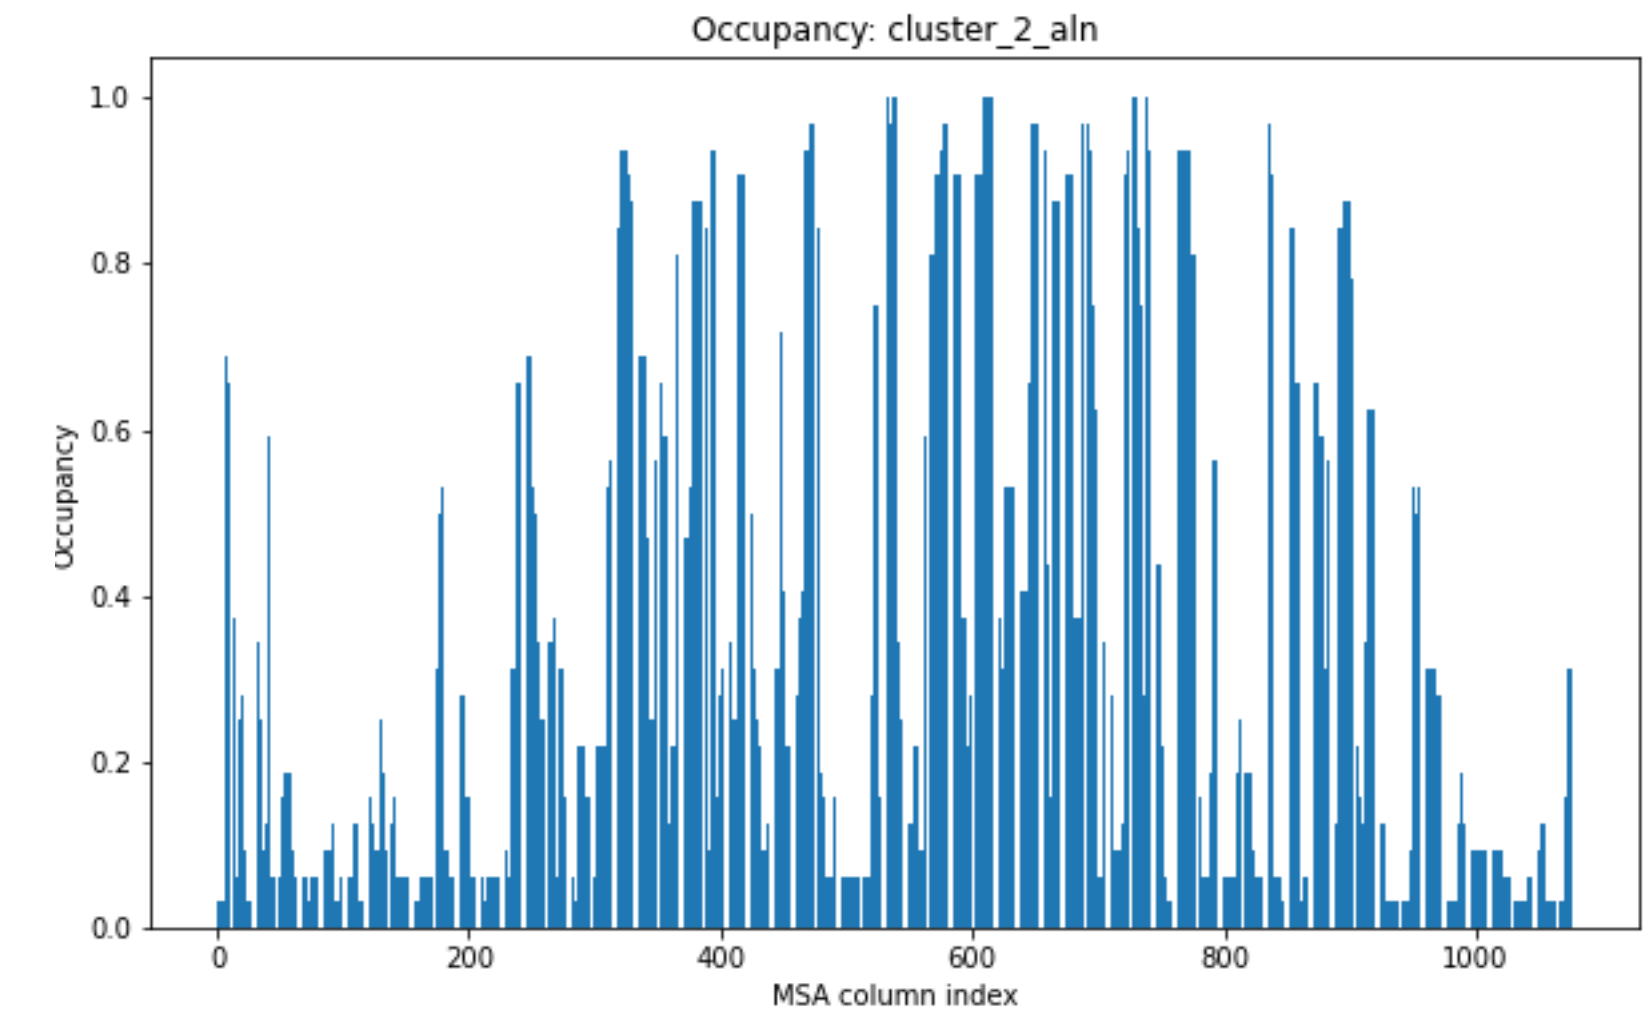

After

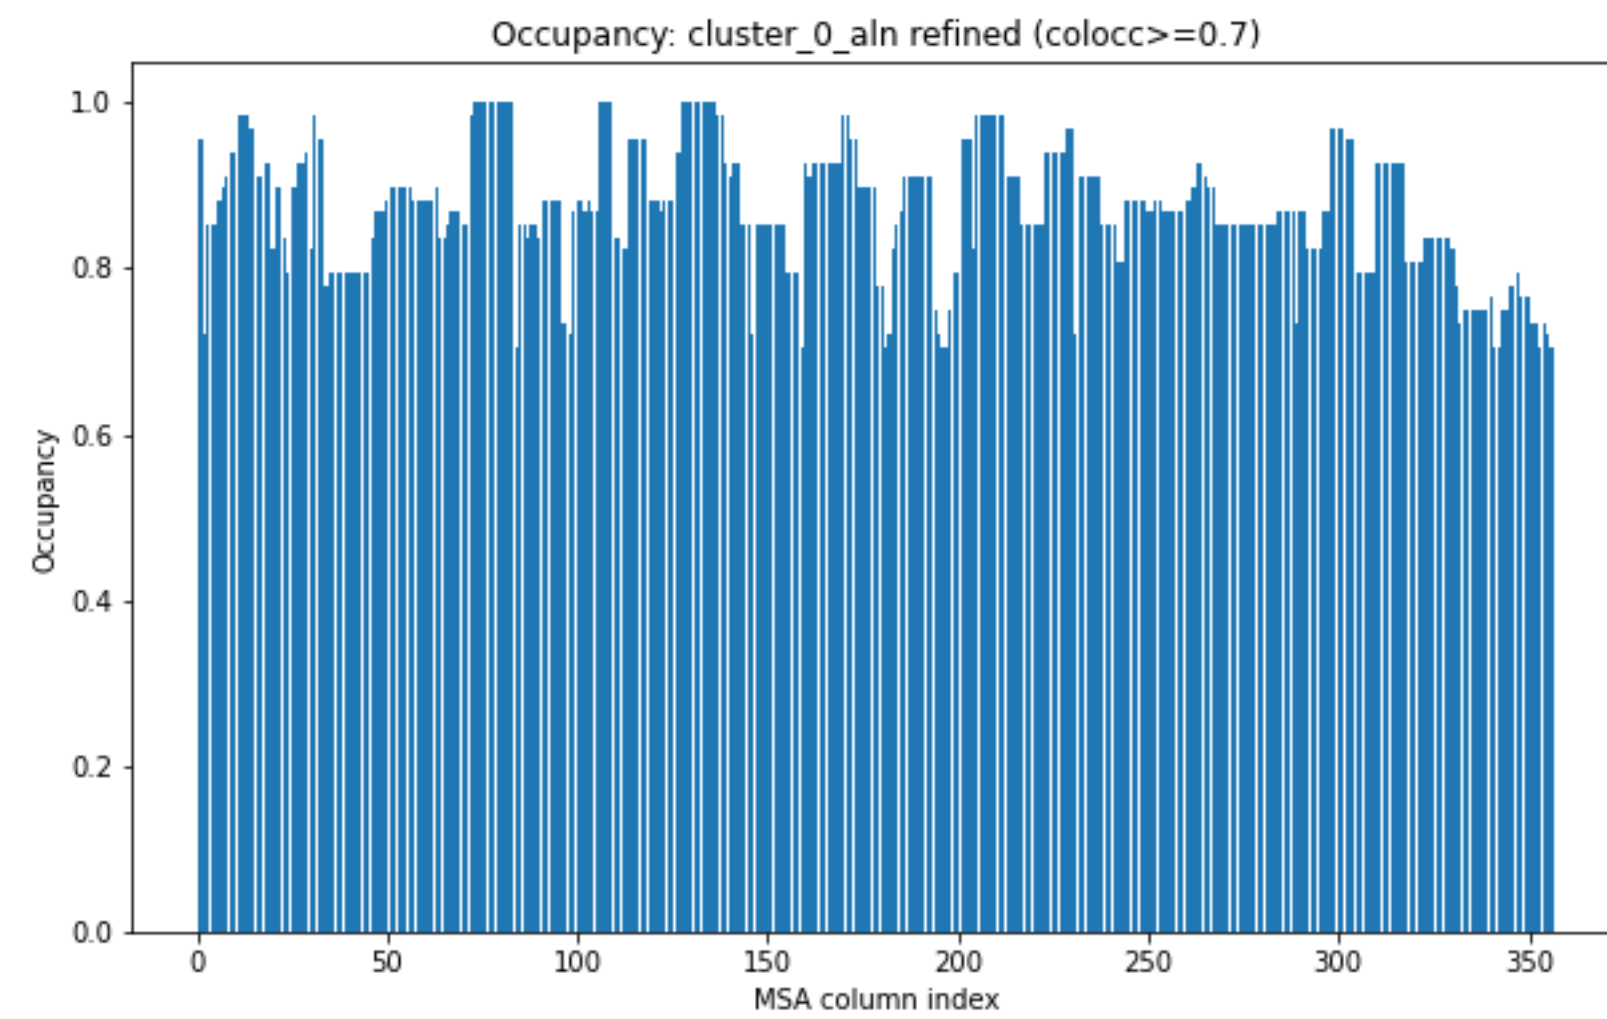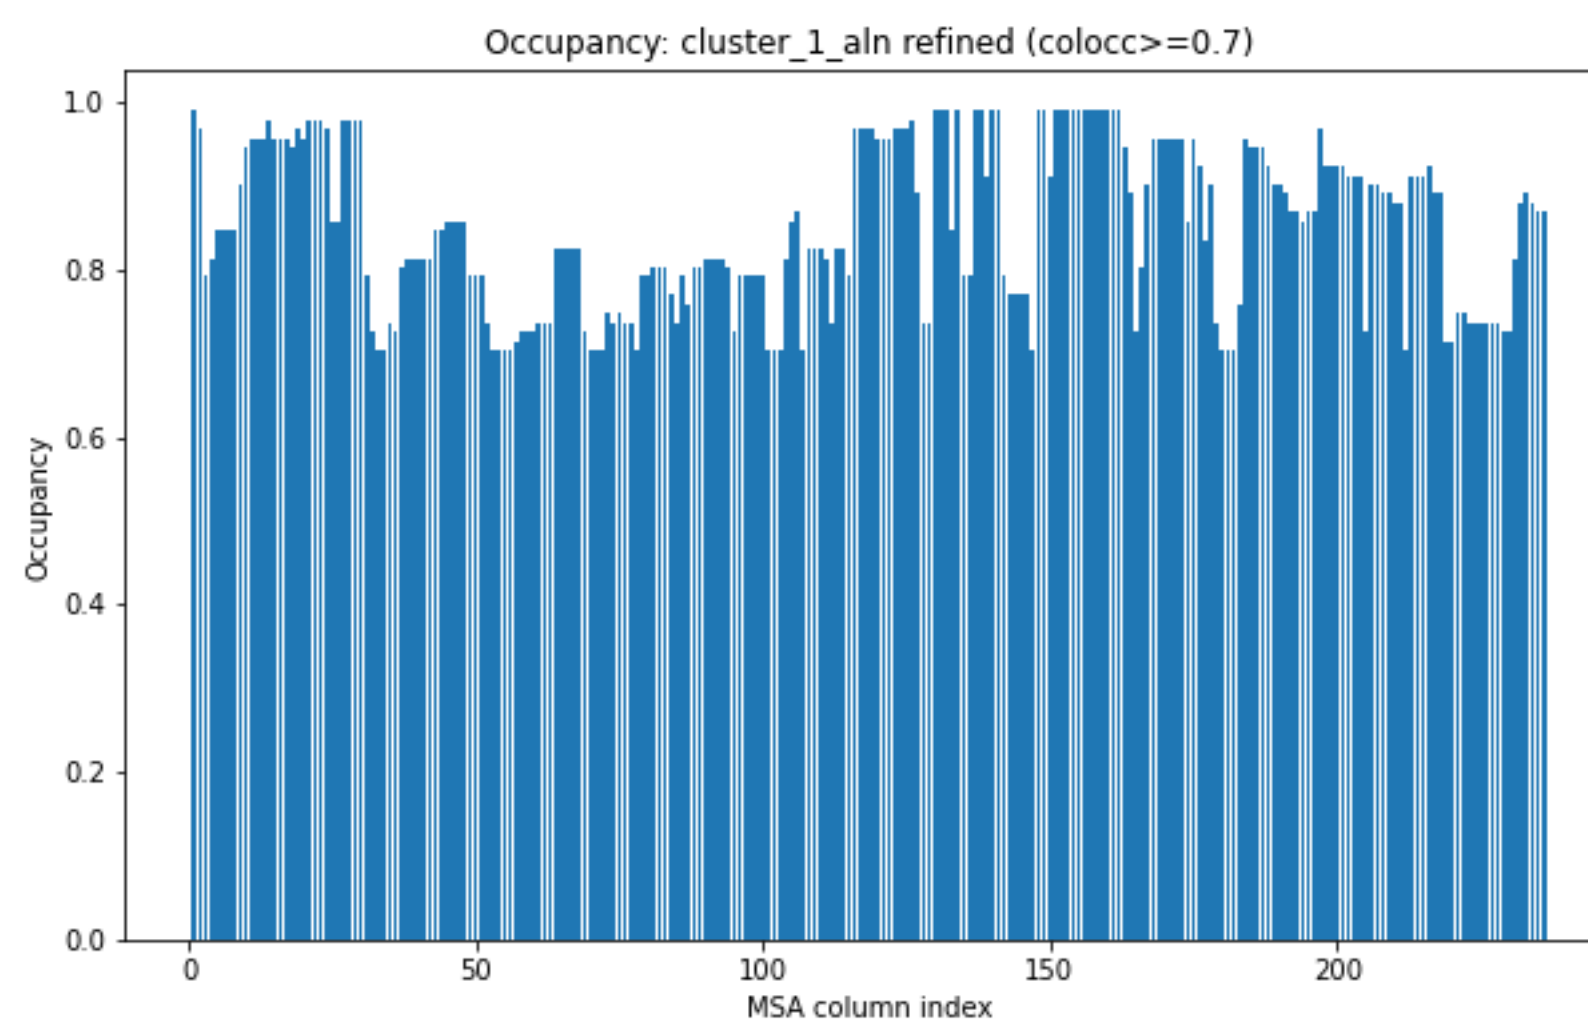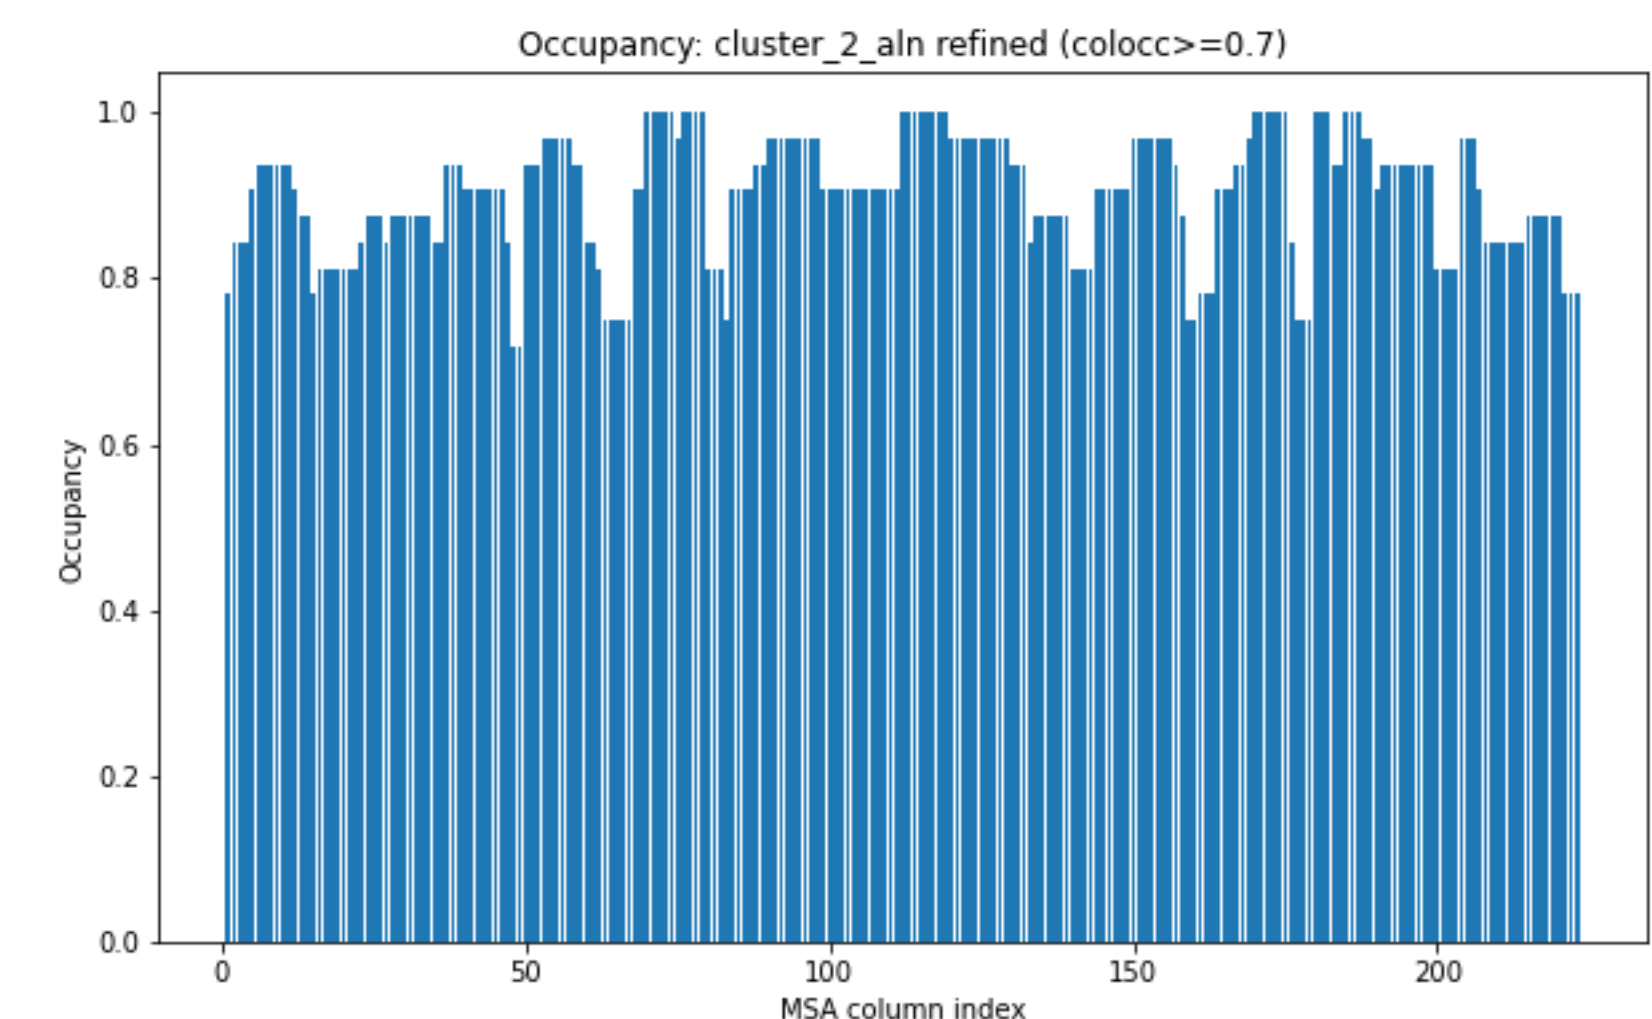

Supplement: s1 [file s1]
